# Supplementary material for: Regnase-1 controls colon epithelial regeneration via regulation of mTOR and purine metabolism
Source: PubMed Central journal article supplement — Proc Natl Acad Sci U S A. 2018 Oct 8;115(43):11036–41. doi: 10.1073/pnas.1809575115 (PMC6205455; doi:10.1073/pnas.1809575115), 2018-10-08
Supplement: pnas.1809575115.sapp.pdf [file pnas.1809575115.sapp.pdf]

Supplementary Information for

## Regnase-1 controls colon epithelial regeneration via regulation of mTOR and purine metabolism

Yasuharu Nagahama, Mayuko Shimoda, Guoliang Mao, Shailendra Kumar Singh, Yuuki Kozakai, Xin Sun, Daisuke Motooka, Shota Nakamura, Hiroki Tanaka, Takashi Satoh, Kazuhiko Maeda, and Shizuo Akira

Corresponding author: Shizuo Akira  
Email: [sakira@biken.osaka-u.ac.jp](mailto:sakira@biken.osaka-u.ac.jp)

**This PDF file includes:**

Supplementary text  
Figs. S1 to S12  
Table S1

## **SI Materials and Methods**

### ***In Situ* hybridization**

Sectioning and ISH were entrusted to GenoStaff (Tokyo, Japan). Briefly, paraffin-embedded Swiss rolled blocks of intestines were sectioned at 6  $\mu\text{m}$ . ISH was performed with the ISH Reagent Kit (Genostaff) according to manufacturer's instructions. The probe for a 422 bp fragment for the ISH analysis was designed from position 2,473 to 2,895 of the mouse *Cla1* (*Gob5*) mRNA. The probes were labeled with a DIG RNA Labeling Kit (Roche Diagnosis). Coloring reactions were performed with NBT/BCIP solution (Sigma) overnight and then washed in PBS. The sections were counterstained with Kernechtrot stain solution (Mutoh) and mounted with G-Mount (Genostaff).

### **Flow cytometry analysis**

Antibodies used in this study were listed in Table S1. Isolated from spleen and perphrial blood and cells were maintained in the dark at 4°C throughout. Cells were washed in ice-cold FACS buffer (2% BSA in PBS), then incubated with each antibody for 15 min and washed twice with FACS buffer. Data were acquired on a BD FACSCanto II, and analyzed using FlowJo software.

### **Determination of microbiota by deep sequencing**

The feces from mice were got from the anus, which were immediately put into dry ice. Amplification of 16S rRNA gene targeting the *V1-V2* region was performed using a primer set (27Fmod: AGRGTTTGATCMTGGCTCAG, 338R: TGCTGCCTCCCGTAGGAGT). DNA libraries were prepared using an Ion Fragment Library Kit (Life Technologies) according to the manufacturer's instructions. Sequencing was performed using a 318 chip and Ion PGM Sequencing 400 Kit (Life Technologies) on the Ion PGM sequencer (Life Technologies). The resulting sequences were analyzed with the QIIME pipeline.

### **DSS-induced colitis with inosine**

Eight- to twelve-week-old (*Regnase-1<sup>fl/fl</sup>* vs. *Regnase-1 <sup>$\Delta$ IEC</sup>*) mice were used for DSS-induced colitis experiment. Acute colitis was induced by administration of 2% DSS (36–50 kDa; MP Biomedicals) in the drinking water for 7 days and changed to water for additional 2 to 3 days. Mice were analyzed in body weight. Inosine (Sigma, 10 mg/kg of body weight) was intraperitoneally injected to mice everyday during DSS-administration.

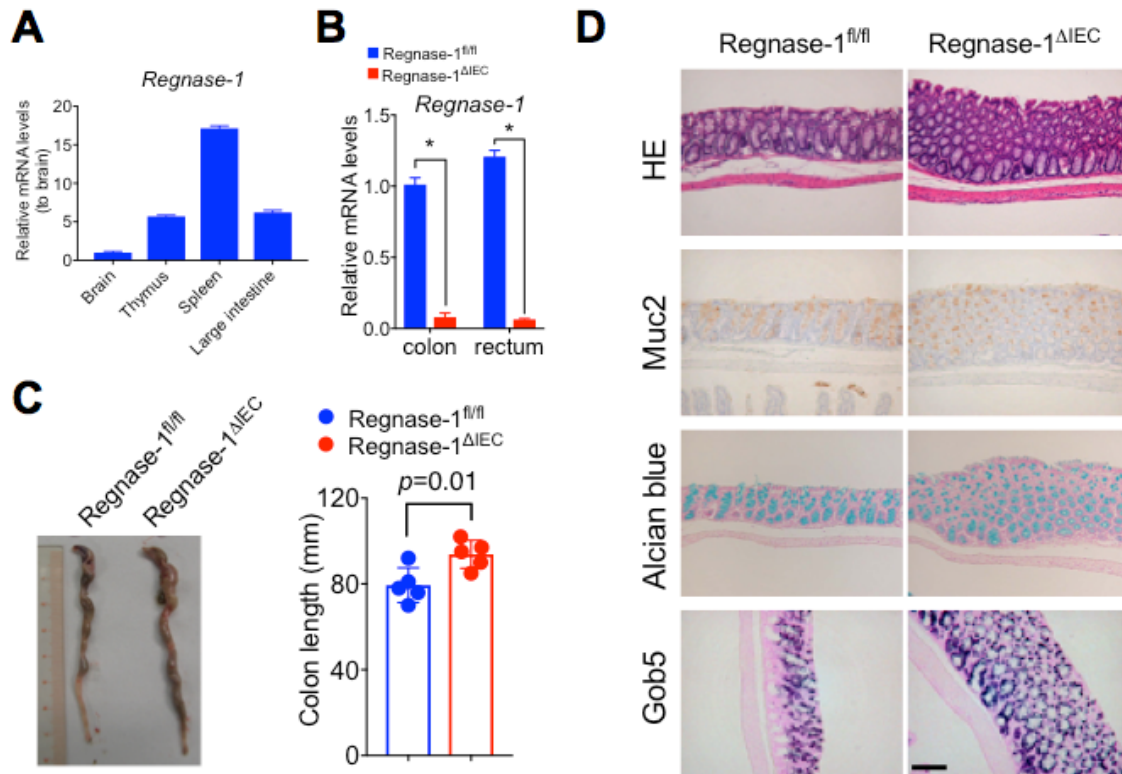

**Fig. S1: IEC-specific deletion of Regnase-1 in mice.**

(A) Regnase-1 expression in tissues. (B) Deficiency of murine *Regnase-1* transcripts in both colon and rectum. \* $P < 0.05$ . (C) Representative pictures of colons and colon length for Regnase-1<sup>fl/fl</sup> ( $n = 5$ ) and Regnase-1<sup>ΔIEC</sup> mice ( $n = 5$ ). (D) Representative colon sections from Regnase-1<sup>fl/fl</sup> and Regnase-1<sup>ΔIEC</sup> mice stained with HE, Muc2 and Alcian blue. *Gob5* transcripts were detected by *in situ* hybridization. Scale bars; 50  $\mu$ m.

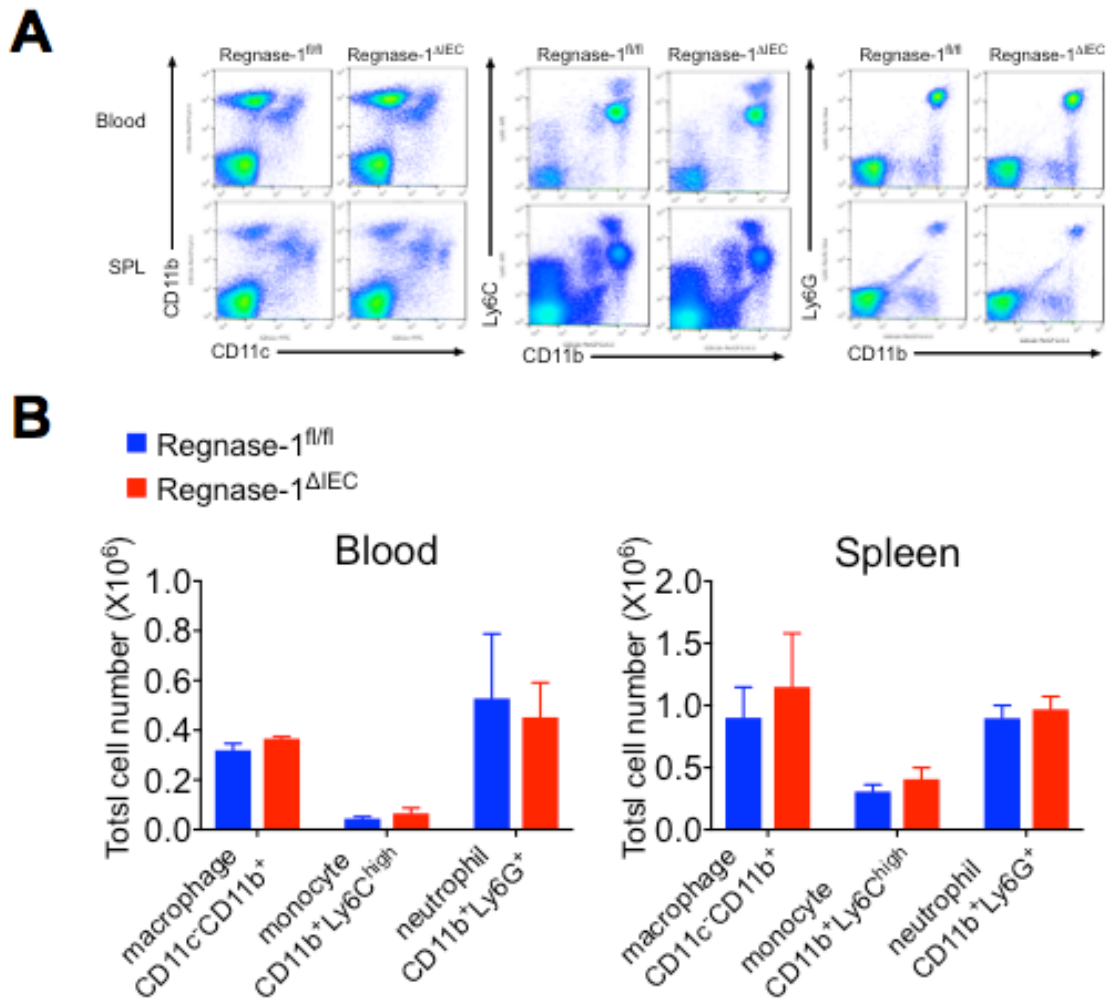

**Fig. S2: FACS analysis of spleen and peripheral blood from Regnase-1<sup>fl/fl</sup> and Regnase-1<sup>ΔIEC</sup> mice.**

Cells were stained with antibodies to CD11b, CD11c, Ly6C and Ly6G. (A) FACS plots. (B) The absolute numbers of the different populations are shown. Data are representative of three separate experiments

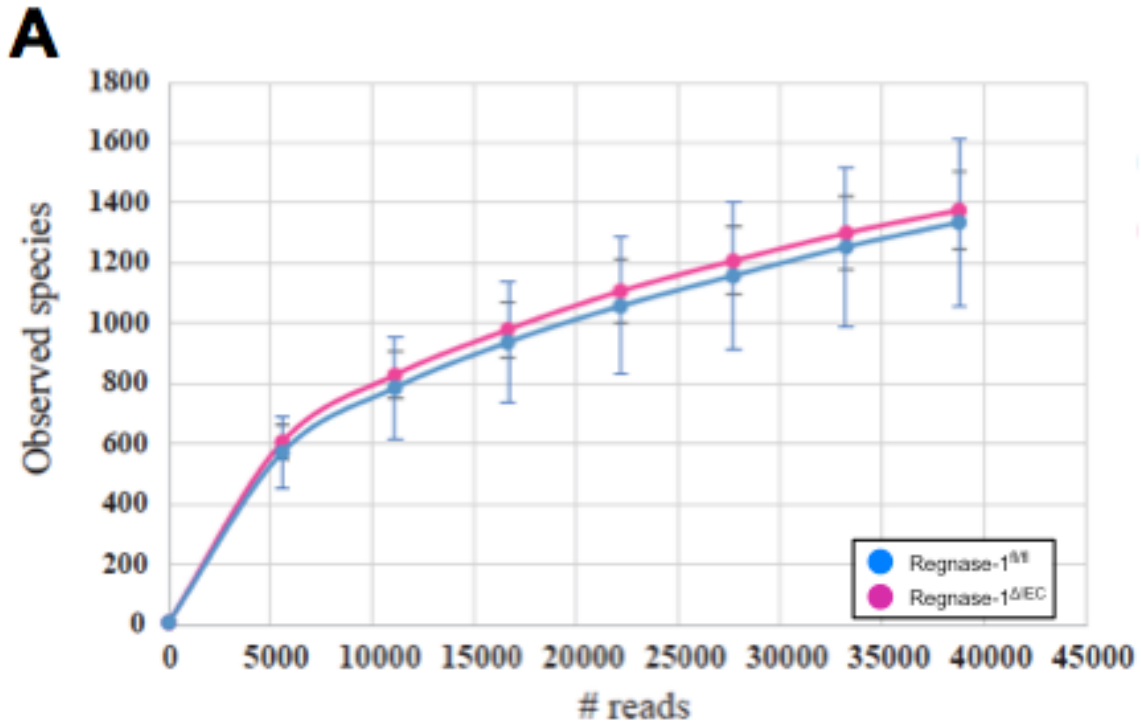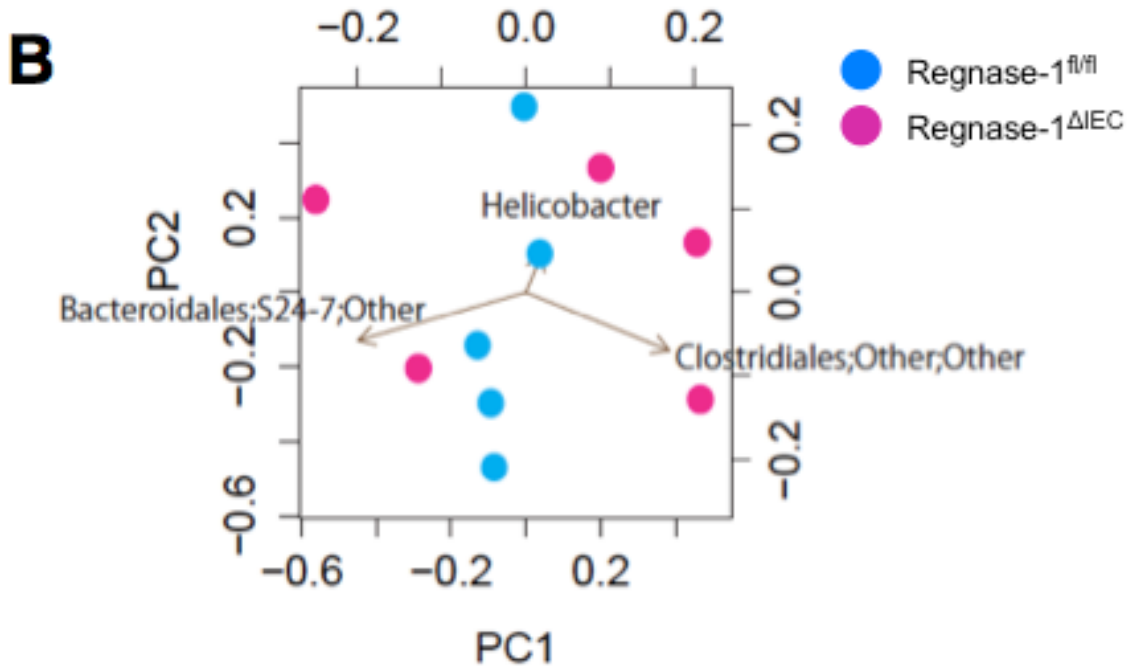

**Fig. S3: Bacterial community.**

(A) The  $y$ -axis shows the number of observed species that would be expected to be found after sampling the number of sequences shown on the  $x$ -axis. (B) Principal component analysis (PCA) of faecal microbiota in Regnase-1<sup>fl/fl</sup> and Regnase-1<sup>ΔIEC</sup> mice at genus level (each  $n=5$  mice).

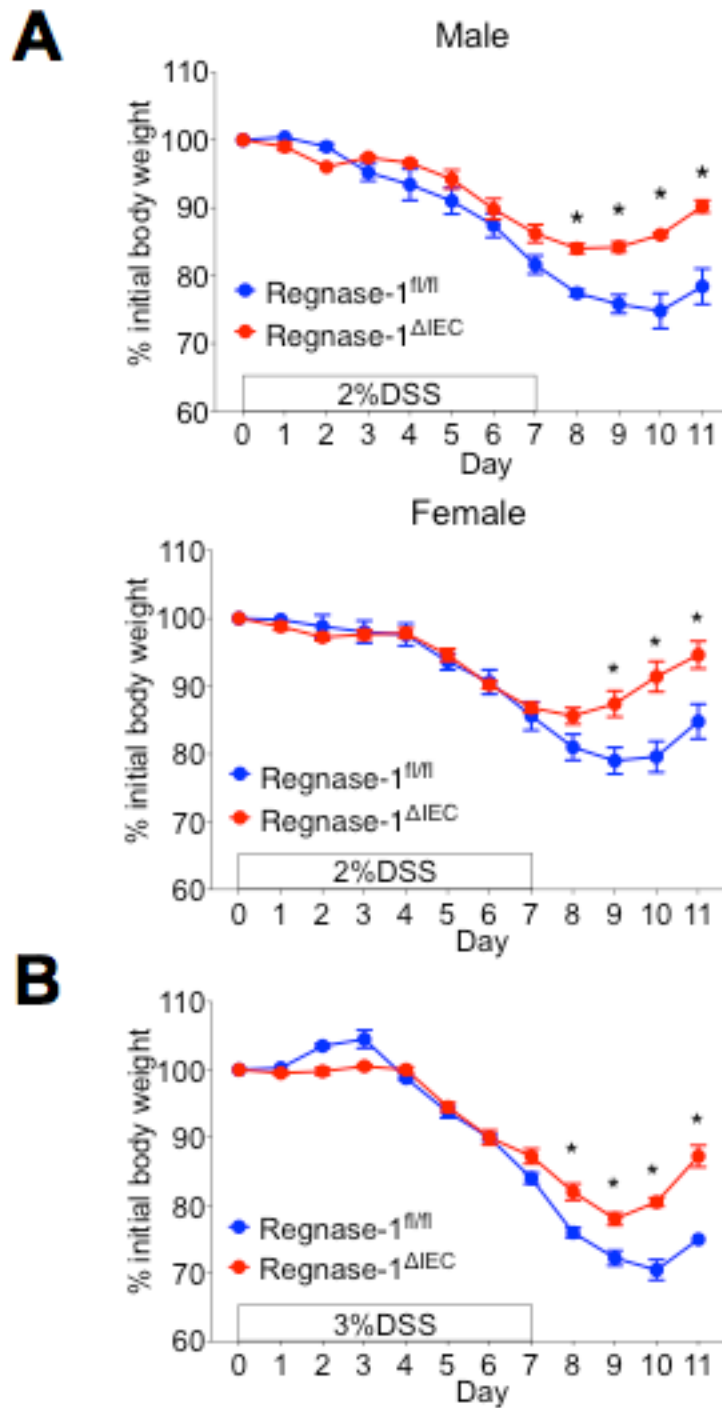

**Fig. S4: Percentage change in DSS-treated body weight between Regnase-1<sup>fl/fl</sup> and Regnase-1<sup>ΔIEC</sup> mice.**

(A) Comparison each male and female group (each 5 mice) in 2% DSS-administration experiment. (B) 3% DSS-treated experiment. \* $P < 0.05$ .

Regnase-1<sup>fl/fl</sup>

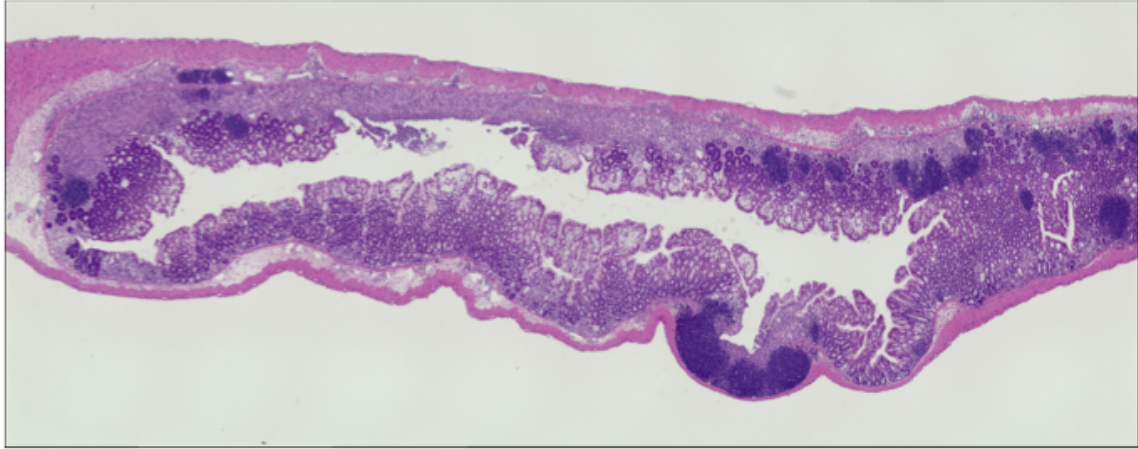

Regnase-1<sup>ΔIEC</sup>

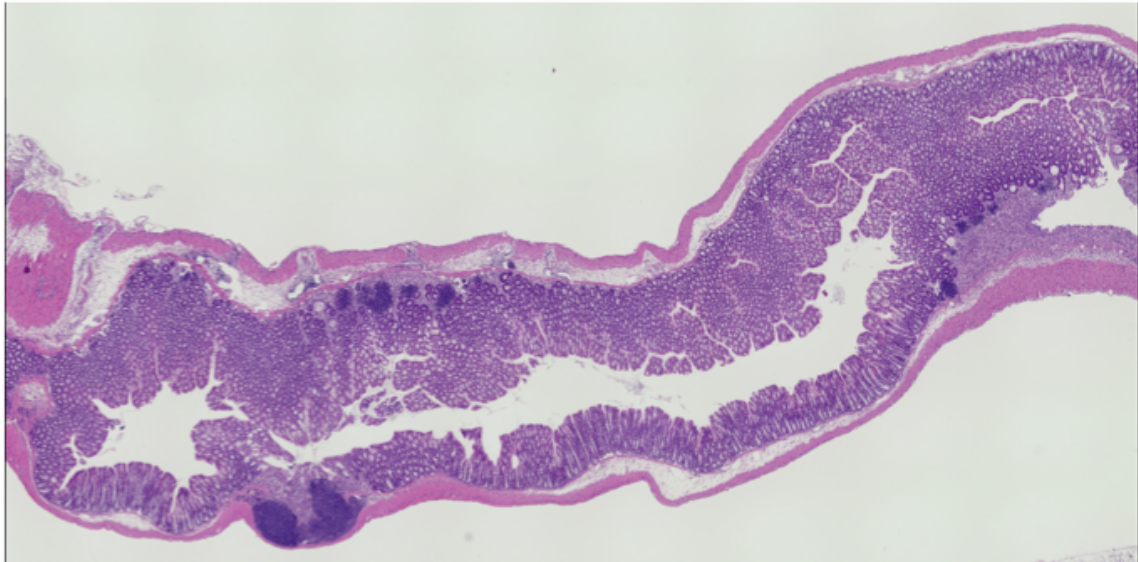

**Fig. S5: Colon colitis sections from Regnase-1<sup>fl/fl</sup> and Regnase-1<sup>ΔIEC</sup> mice with HE staining.**

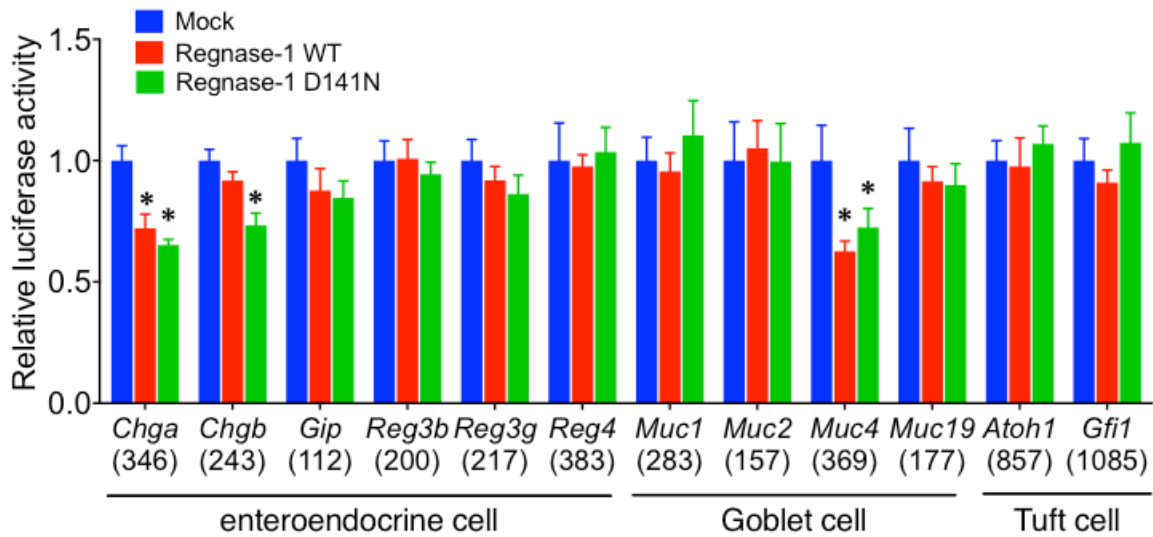

**Fig. S6: Luciferase assay for 3'UTR of genes, which are associated with enteroendocrine cell, Goblet cell and Tuft cell.**

The length of each 3'UTR is indicated in brackets. \* $P < 0.05$ .



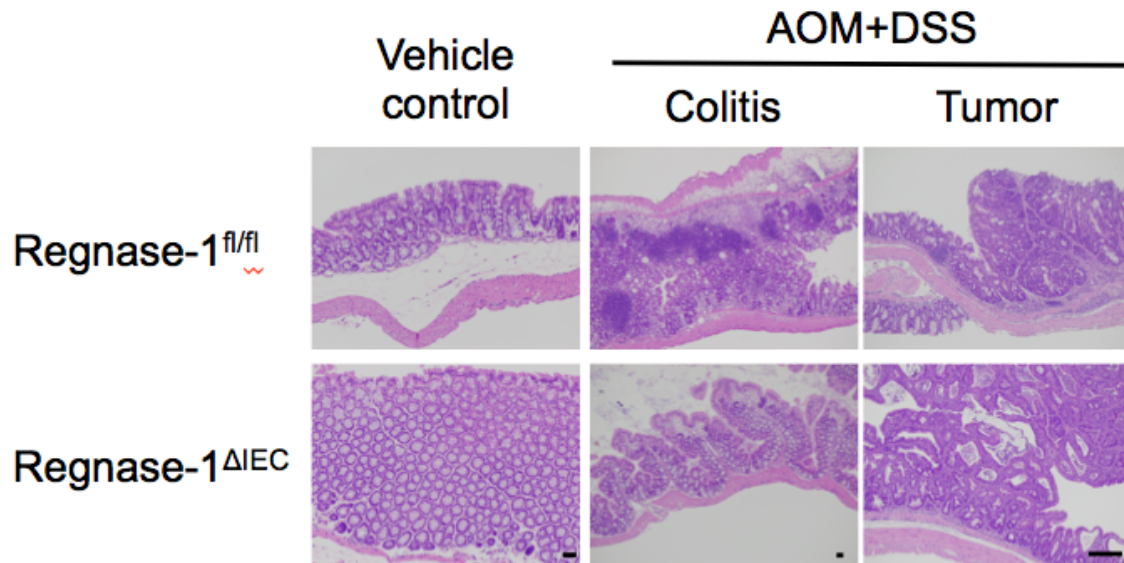

**Fig. S7: Colon colitis and tumor sections from Regnase-1<sup>fl/fl</sup> and Regnase-1<sup>ΔIEC</sup> mice with HE staining.**  
Scale bars, 50 μm.

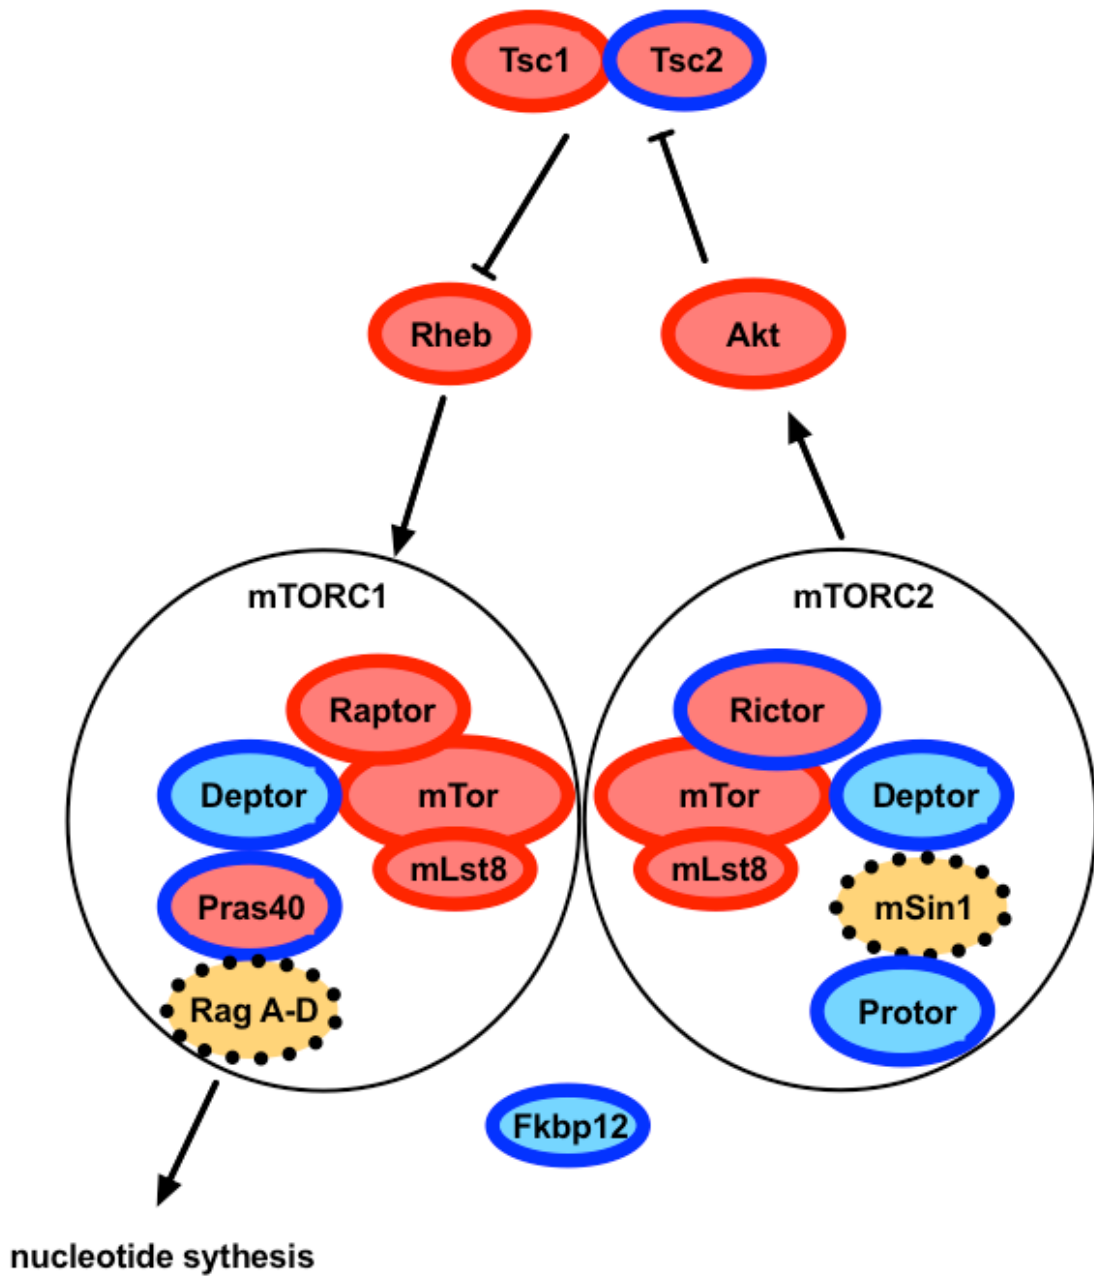

**Fig. S8: Target genes of Regnase-1 in mTOR signaling pathway.**  
 Red and blue circles indicate the target and the non-target by 3'UTR luciferase assay, respectively. Dot circles are not tested.

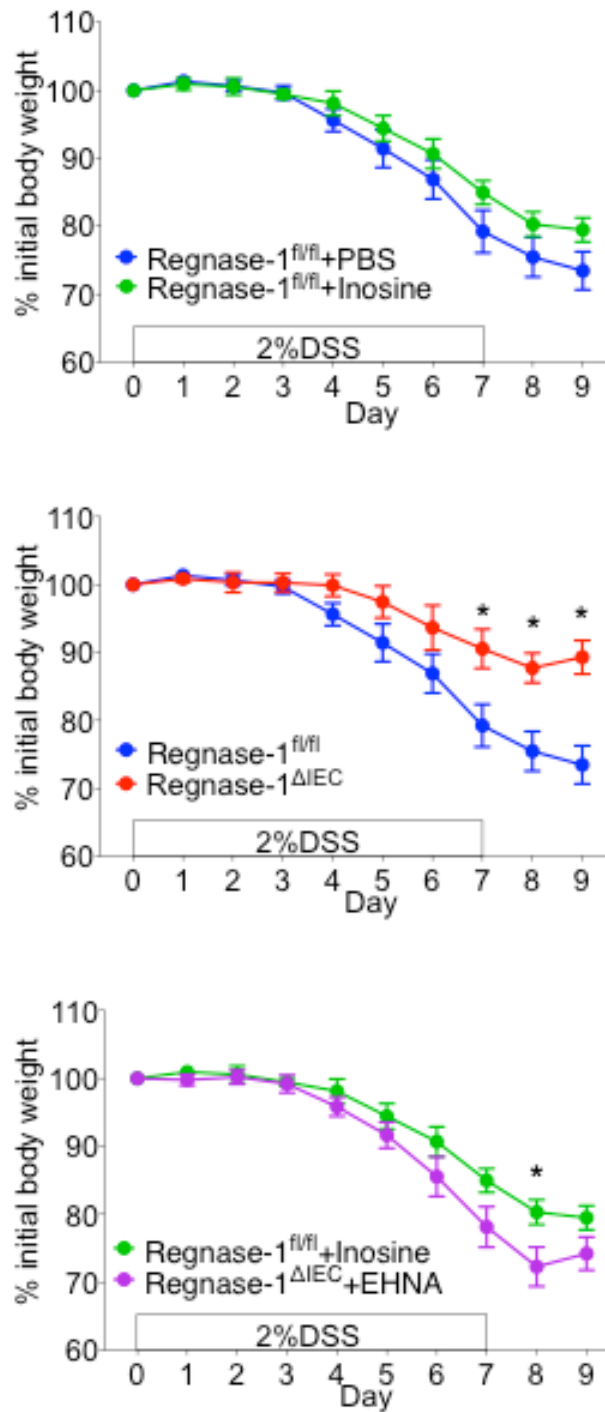

**Fig. S9: Percentage change in 2% DSS-induced body weight compared with starting weight of mice with PBS or EHNA (0.3 mg/kg, i.p.) and with inosine (10 mg/kg, i.p.) for 7 days. At least five mice were used for each group. \* $P < 0.05$ .**

**A**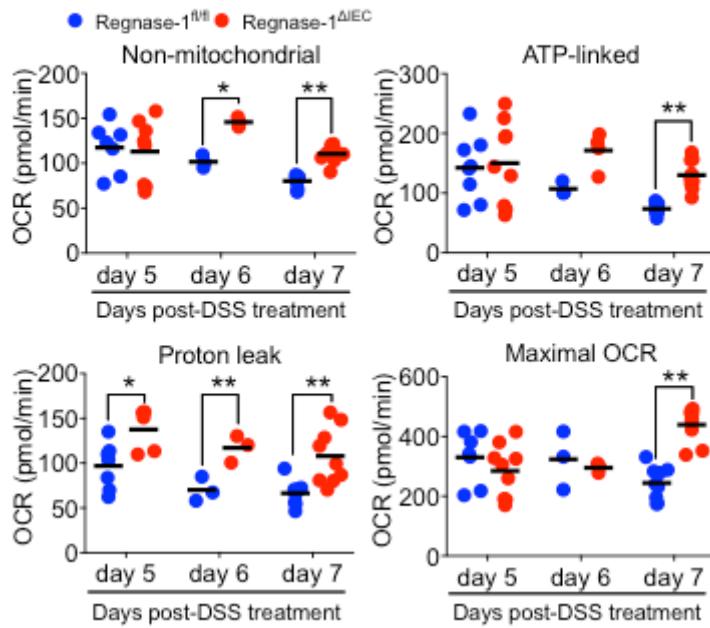**B**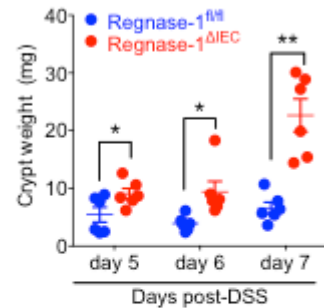**Fig. S10: Seahorse analysis.**

(A) Basal OCR, ECAR and dependence of each energy formula during DSS-treated time points from Regnase-1<sup>fl/fl</sup> and Regnase-1<sup>ΔIEC</sup> mice. (B) The weight of isolated crypts from Regnase-1<sup>fl/fl</sup> and Regnase-1<sup>ΔIEC</sup> mice in each indicated DSS-treated time points. \* $P < 0.05$  and \*\* $P < 0.01$ .

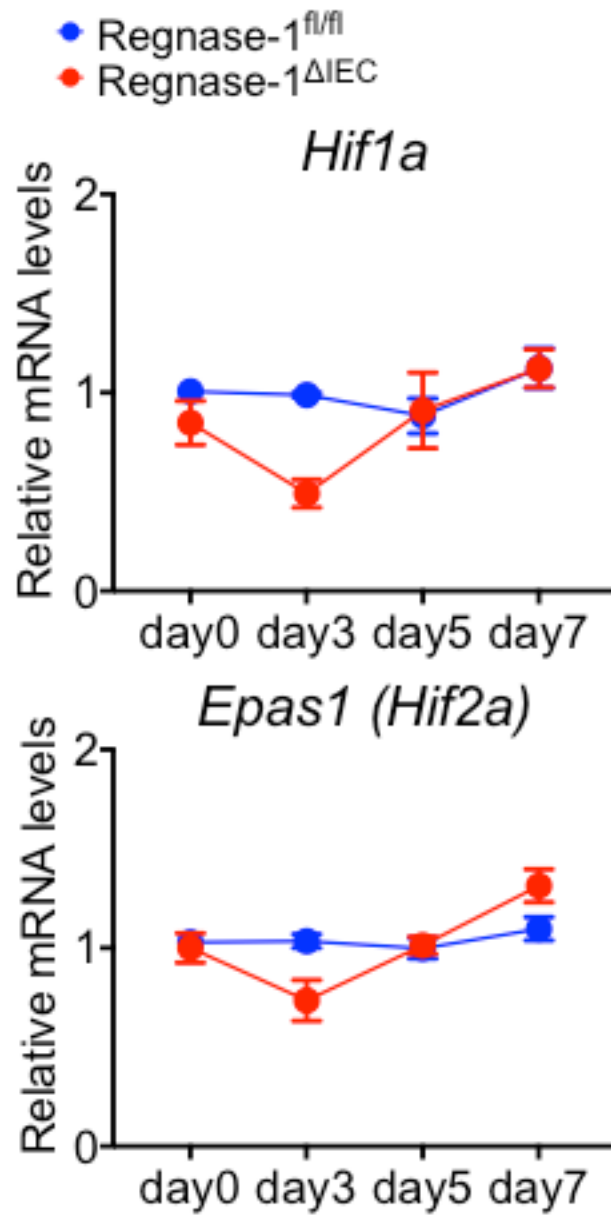

**Fig. S11: qPCR analysis of *Hif1a* and *Epas1 (Hif2a)* in IECs during indicated day points.**

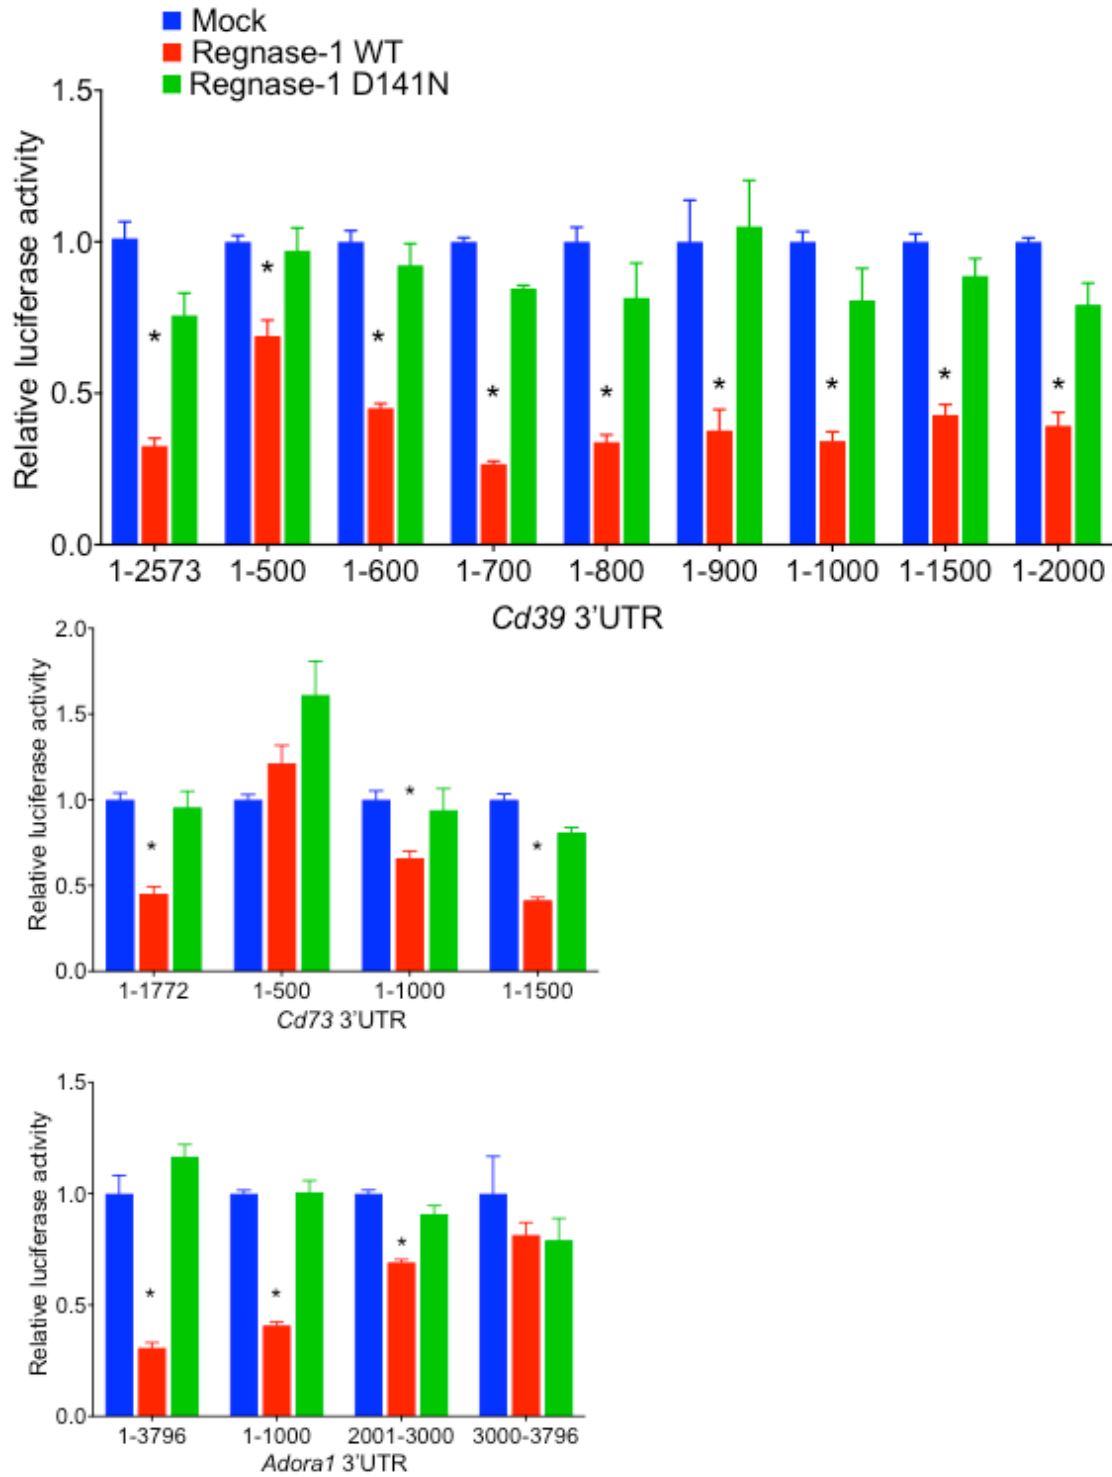

**Fig. S12: Luciferase assay for the deletion 3'UTR of *Cd39*, *Cd73* and *Adora1*.**  
 The length of each 3'UTR is indicated in the low axis. \* $P < 0.05$ .

**Table S1: Primers, probes, and antibodies used in this study.**

|  | Gentyping primer | Primer sequence (5' to 3')  |
|--|------------------|-----------------------------|
|  | Vil_Cre_Fw       | GTGTGGGACAGAGAACAACC        |
|  | Vil_Cre_Rv       | ACATCTTCAGGTTCTGCGGG        |
|  | LAF              | GGTTCCTTGGACACACAGCAGATCTGG |
|  | MAR              | CTCAGAAAGGAGGGTCCAGAAAGCAG  |

  

| Gene name  | 3'UTR primer           | Primer sequence (5' to 3')                      |
|------------|------------------------|-------------------------------------------------|
| Tsc1       | mTsc1 3UTR-NheI-S      | <u>GGGGCTAGCAGAGGGTCTGTCAGTGTTTCATTTGCGTCTT</u> |
|            | mTsc1 3UTR-NheI-AS     | <u>GGGGCTAGCGGAGTGCAAAACAATAAATCTTTATTTGTT</u>  |
| Tsc2       | mTsc2 3UTR-XbaI-S      | <u>GGGTCTAGAGGCCAGCAGATCCATGACTAGAGTCCTGTG</u>  |
|            | mTsc2 3UTR-XbaI-AS     | <u>GGGTCTAGACCCAGCCTCCAAGATGTAATTTATTCGCC</u>   |
| Rheb       | mRheb 3UTR-S           | <u>GGGTCTAGACAATTCTGCTGCAGAGCCTGCGGACACTGG</u>  |
|            | mRheb 3UTR-AS          | <u>GGGTCTAGATGCAGTAAATACTGTTTACTAGGCATGAC</u>   |
| Akt1       | mAkt1 3UTR-S           | <u>GGGTCTAGAACCTGATGTTTTGTTTCTCGGATGCGCTGG</u>  |
|            | mAkt1 3UTR-AS          | <u>GGGTCTAGACAAGCTTGAAAAGCAATTTTTATTGAATTT</u>  |
| mTor       | mTor 3UTR-S            | <u>GGGGCTAGCCTGAGGCCTGGAAAACCACGTCGTCTCCTC</u>  |
|            | mTor 3UTR-AS           | <u>GGGGCTAGCTATGCTTTTAAAATTCTGATGTCATTTATT</u>  |
| mLst8      | mLst8 3UTR-S           | <u>GGGGCTAGCACTTGGCCCTTGAGGCTGCATTGGGCAATC</u>  |
|            | mLst8-3UTR-AS          | <u>GGGGCTAGCCTGATGGTTCATACACATTTATTGATAGTT</u>  |
| Dptor      | mDptor 3UTR-S          | <u>GGGTCTAGAGCACAGAGACATCCCTGCTTGCCCCTATC</u>   |
|            | mDptor 3UTR-AS         | <u>GGGTCTAGAGGTAATTTTTAAAAATGTAACATTTATTTTC</u> |
| Rptor      | mRptor 3UTR-S          | <u>GGGTCTAGACGGCACCTAGGACCACTGCCAGGCCGCAGC</u>  |
|            | mRptor 3UTR-AS         | <u>GGGTCTAGATCAAGATCTCCATGGCAACCAGCATGTCTT</u>  |
| Pras40     | mPras40 3UTR-S         | <u>GGGTCTAGAGCGAACAGAAAGCCTTGGCCTGCGAGAGGC</u>  |
|            | mPras40 3UTR-AS        | <u>GGGTCTAGAAACTCACTAGTCAGAGGTAAACTTTAATC</u>   |
| Rictor     | mRictor 3UTR-S         | <u>GGGTCTAGACCTCATGCTTATGACGTTTATAGCTGGATA</u>  |
|            | mRictor 3UTR-AS        | <u>GGGTCTAGATTAAGAATTTTAAGTACATTTTATAACAA</u>   |
| Protor     | mProtor 3UTR-S         | <u>GGGTCTAGATGGCCTGAGACTAGTTCATGTTTTACTGA</u>   |
|            | mProtor 3UTR-AS        | <u>GGGTCTAGATCTGGGGCTGTAAATTTATTTTCATGCCTTC</u> |
| Cd39       | mCD39 3'UTR-NheI-S     | <u>GGGGCTAGCCAGGAGCGGCTGAAATGTGCTGGCTGGAGA</u>  |
|            | mCD39 3'UTR-NheI-AS    | <u>GGGGCTAGCATCACGTTACATTTCTTACTCGTTTATTTA</u>  |
| Cd39 1-500 | mCD39 3'UTR-NheI-500AS | <u>GGGGCTAGCAGCACATATTTATCTACTTTAGAAAACCTCT</u> |
| Cd39 1-600 | mCD39 3'UTR-NheI-600AS | <u>GGGGCTAGCGAACATACAATGTGTTTGTCTCCACTCTTA</u>  |
| Cd39 1-700 | mCD39 3'UTR-NheI-700AS | <u>GGGGCTAGCCTACTGTACATGCTATGCCCTGAATGCCT</u>   |

|                                           |                         |                                                        |
|-------------------------------------------|-------------------------|--------------------------------------------------------|
| Cd39 1-800                                | mCD39 3'UTR-NheI-800AS  | <u>GGGGCTAGCTTAACATATAAAAACCACACAAAACGCTAAA</u>        |
| Cd39 1-900                                | mCD39 3'UTR-NheI-900AS  | <u>GGGGCTAGCCAAATCGTCAATATAGTGATTGTTGTATAA</u>         |
| Cd39 1-1000                               | mCD39 3'UTR-NheI-1000AS | <u>GGGGCTAGCCACACATACACATAACTGAAAGCCAAA</u>            |
| Cd39 1-1500                               | mCD39 3'UTR-NheI-1500AS | <u>GGGGCTAGCTTTCCATAATAAAAGTCCATAGCCACTTAT</u>         |
| Cd39 1-2000                               | mCD39 3'UTR-NheI-2000AS | <u>GGGGCTAGCATAATCCTAGCACAGGTGGATCTCTGAGTT</u>         |
| Cd73 full length                          | mCD73 3'UTR-XbaI-S      | <u>GGGTCTAGACAGGGAGTCTCCTTGTCCTTGATGTCAAAC</u>         |
|                                           | mCD73 3'UTR-XbaI-AS     | <u>GGGTCTAGAACTATATCTTCAGCTTTATTTTTGGAATTT</u>         |
| Cd73 1-500                                | mCD73 3'UTR-XbaI-500AS  | <u>GGGTCTAGAAAATCTACTTGTAATTATAATGTTTGTTT</u>          |
| Cd73 1-1000                               | mCD73 3'UTR-XbaI-1000AS | <u>GGGTCTAGAGAAGGAGAGAGGCAGGGCTTTTGAGTCGG</u>          |
| Cd73 1-1500                               | mCD73 3'UTR-XbaI-1500AS | <u>GGGTCTAGACTGCAACAACTTCATAAAGGATTGGAAT</u>           |
| Ak1                                       | Ak1 3UTR-XbaI-S         | <u>GGGTCTAGACTGGATCCCTTGCCAGCTCCAGCCCGCC</u>           |
|                                           | Ak1 3UTR-XbaI-AS        | <u>GGGTCTAGATTATAACTGAAATACATTTATTTATTTTAA</u>         |
| Xod                                       | Xdh 3UTR-NheI-S         | <u>GGGGCTAGCAAAGGAGGCTCCCCAGTATGGTTTTATACT</u>         |
|                                           | Xdh 3UTR-NheI-AS        | <u>GGGGCTAGCTTAACCCACATTCATTATCATGTTTTATT</u>          |
| Ada                                       | Ada 3UTR-S              | <u>GGGTCTAGACCACCACAGACTGACGCAGGGCGGGTCCCC</u>         |
|                                           | Ada 3UTR-AS             | <u>GGGTCTAGAACATAAACATAATTAATATTTAAAAATAA</u>          |
| Adora1 1-1000                             | Adora1 3UTR-XbaI-S      | <u>GGGTCTAGAGCTCTGCCTTGCTCCATCTAGCCACACCC</u>          |
|                                           | Adora1 3UTR-XbaI-1000AS | <u>GGGTCTAGAGTCTGGTCTGGTCTGGTCTTTTACACTTCT</u>         |
| Adora1 2001-3000                          | Adora1 3UTR-XbaI-2001S  | <u>GGGTCTAGAAAGCTGCTAGAAGAGATAGTGGGGAGTCGG</u>         |
|                                           | Adora1 3UTR-XbaI-3000AS | <u>GGGTCTAGACCAAGATCATCTGGATGAAAAACAAGATGG</u>         |
| Adora1 3001-3736                          | Adora1 3UTR-XbaI-3001S  | <u>GGGTCTAGAGCTGGAAGCAAAGTCAGAGGAGGGTAATGA</u>         |
|                                           | Adora1 3UTR-XbaI-AS     | <u>GGGTCTAGATTACTACTCATTTTAATTACATTTATTGGT</u>         |
| Adora1 full length (GeneArt seamless kit) | Adora1_FW2              | <u>GATCGCCGTGTAATTCTAGAGCTCTGCCTTGCTCC</u>             |
|                                           | Adora1_RV2              | <u>AAGCGGCCGGCCGCCCGACTTACTACTCATTTTAATTACATTTATTG</u> |
|                                           | Chgb                    | <u>GGGTCTAGACAGTTGGAGAGACGAGCCTTTCACTGAAGG</u>         |
| Chgb                                      | Chgb UTR-S              | <u>GGGTCTAGACAGGTAATCTTTTTATTGTTTGTTTCA</u>            |
|                                           | Chgb UTR-AS             | <u>GGGTCTAGACTGACCTAGCCCAGAGCAGGACTGGACTCT</u>         |
| Gip                                       | Gip 3UTR-XbaI-S         | <u>GGGTCTAGAACTTCAGCTTAAGGCTTTATTGGTTTGGTT</u>         |
|                                           | Gip 3UTR-XbaI-AS        | <u>GGGTCTAGAACTTATCAGACAGCAAACATCCCGAATTTG</u>         |
| Reg3b                                     | mReg3b 3UTR-XbaI-S      | <u>GGGTCTAGATGTGACAGAAAGCTTATTTTTATTTTAGAA</u>         |
|                                           | mReg3b 3UTR-XbaI-AS     | <u>GGGTCTAGAAGTACAGAATTGACATCATGGGTTGATATA</u>         |
| Reg3g                                     | mReg3g 3UTR-XbaI-S      | <u>GGGTCTAGAATGAGCATGAGTTATATACTTTAATATTAT</u>         |
|                                           | mReg3g 3UTR-XbaI-AS     | <u>GGGTCTAGAAGCAAAAATCAAGCGTCTACCAGCCTTGCA</u>         |
| Reg4                                      | Reg4 3UTR-XbaI-S        | <u>GGGTCTAGAGCTGTTTCTTGGCTCCAAAACCTTACTGGT</u>         |
|                                           | Reg4 3UTR-XbaI-AS       | <u>GGGTCTAGAGCAAGTCACCCACCCACTTGGGGCAGC</u>            |
| Muc1                                      | Muc1 3UTR-XbaI-S        | <u>GGGTCTAGAGCAAGTCACCCACCCACTTGGGGCAGC</u>            |



|       |                           |                                                  |
|-------|---------------------------|--------------------------------------------------|
|       | Muc1 3UTR-XbaI-AS         | <u>GGGTCTAGATA</u> AACTAACAGGAGGCCATCTTTTATTCAGC |
| Muc2  | Muc2 3UTR-XbaI-S          | <u>GGGTCTAGA</u> AATGGGTTGTACCGTGCACATTCTTCGCAT  |
|       | Muc2 3UTR-XbaI-AS         | <u>GGGTCTAGAG</u> AGTGGCTATGCCTGAGTTTATTATCGGAA  |
| Muc4  | Muc4 3UTR-XbaI-S          | <u>GGGTCTAGAG</u> GGCCCTGTCCCAGATGGGCAGCTGCACCTA |
|       | Muc4 3UTR-XbaI-AS         | <u>GGGTCTAGAT</u> TATTTAAATAGATTTTAAATGAGAAGTAAG |
| Muc19 | Muc19 3UTR-NheI-S         | <u>GGGGCTAGCT</u> GCCCGCGTTGCCTTTCGGTTGCTCTTAT   |
|       | Muc19 3UTR-NheI-AS        | <u>GGGGCTAGCT</u> CCTTGCACCATGGCGTTTATTTCCAGCC   |
| Atoh1 | Atoh1 3UTR-S              | <u>GGGTCTAGAG</u> AAGGCAACAGCTCCCTGAAAAGTGAACA   |
|       | Atoh1 3UTR-AS             | <u>GGGTCTAGAT</u> TCCGAGTTTATTTTATCATTGTAAAAGA   |
| Gfi1  | Gfi1 3UTR-XbaI-S          | <u>GGGTCTAGAG</u> TACCCTGGCAGCCCGCAACACCAGCTGTG  |
|       | Gfi1 3UTR-XbaI-AS         | <u>GGGTCTAGAG</u> TAATAATCTTAATACTTTATTAAGTTAAA  |
| Fkbp2 | artificial gene synthesis |                                                  |
| Chga  | artificial gene synthesis |                                                  |

| Gene name           | Probe ID in Applied Biosystems |
|---------------------|--------------------------------|
| Entpd1 (mCd39)      | Mm00515447_m1                  |
| Nt5e (mCd73)        | Mm00501910_m1                  |
| A1R (Adora1)        | Mm01308023_m1                  |
| A2AR (Adora2a)      | Mm00802075_m1                  |
| A2BR (Adora2b)      | Mm00839292_m1                  |
| A3R (Adora3)        | Mm00802076_m1                  |
| Ent1 (Slc29a1)      | Mm01270577_m1                  |
| Ent2 (Slc29a2)      | Mm00432817_m1                  |
| Zc3h12a (Regnase-1) | Mm00462535_g1                  |
| Hif1a               | Mm00468869_m1                  |
| Epas1 (Hif2a)       | Mm01236112_m1                  |

| Antibodies  | Company                   | Identifier |
|-------------|---------------------------|------------|
| Mucin2      | Santa Cruz Biotechnology  | sc-15334   |
| Ki67        | abcam                     | ab16667    |
| ZO-1        | eBioscience               | 14-9776-80 |
| pS2448 mTOR | Cell Signaling Technology | 5536S      |
| mTOR        | Cell Signaling Technology | 2972S      |

|                |                           |       |
|----------------|---------------------------|-------|
| T421/S424 S6K  | Cell Signaling Technology | 9204S |
| S6K            | Cell Signaling Technology | 9964S |
| pT37/46 4E-BP1 | Cell Signaling Technology | 2855S |
| 4E-BP1         | Cell Signaling Technology | 9664S |
| $\beta$ -actin | Sigma                     | A5441 |

---

| Flow Cytometry Antibodies | Company   | Identifiers |
|---------------------------|-----------|-------------|
| CD11b-PerCP cy5.5         | Biolegend | 101230      |
| CD11c-FITC                | Biolegend | 117306      |
| Ly6C-APC                  | Biolegend | 128016      |
| Ly6G-Pacific Blue         | Biolegend | 127612      |
| EpCAM (CD326)-FITC        | Biolegend | 118208      |
| EpCAM (CD326)-PE          | Biolegend | 118206      |
| CD45-APC                  | Biolegend | 103112      |

---
